# Supplementary material for: Therapeutic benefit of apremilast on enthesitis and dactylitis in patients with psoriatic arthritis: a pooled analysis of the PALACE 1–3 studies
Source: PubMed Central journal article supplement — RMD Open. 2018 Jun 27;4(1):e000669. doi: 10.1136/rmdopen-2018-000669 (PMC6045740; doi:10.1136/rmdopen-2018-000669), 2018-06-27

## Supplementary Material

**Supplementary Figure 1** Design of the PALACE 1, 2, and 3 studies. \*All doses were titrated over the first week of treatment. †Patients whose swollen and tender joint counts had not improved by  $\geq 20\%$  at Week 16 were considered non-responders and were required to be re-randomised (1:1) to apremilast 30 mg twice daily or 20 mg twice daily if they were initially randomised to placebo. Apremilast-treated patients remained on their initial dose. ‡At Week 24, all remaining placebo patients were re-randomised to apremilast 30 mg twice daily or 20 mg twice daily. ACR20, 20% improvement in American College of Rheumatology response criteria; BSA, body surface area; DMARD, disease-modifying anti-rheumatic drug.

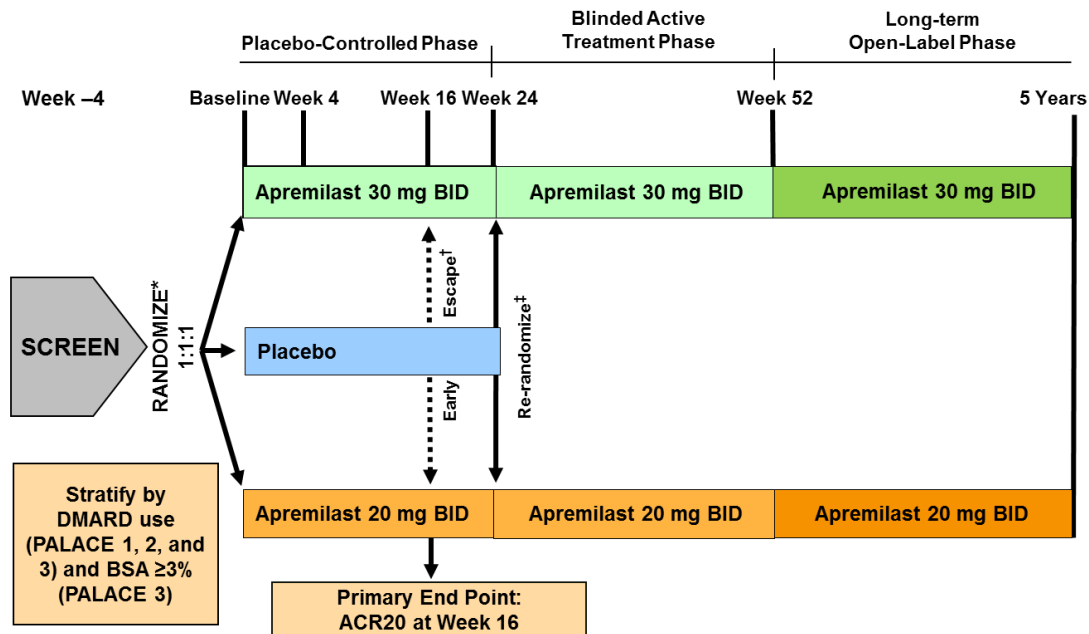

Supplement: rmdopen-2018-000669supp001.pdf [file rmdopen-2018-000669supp001.pdf]
